# Supplementary material
Source: publisher figshare collection journal article supplement (https://karger.figshare.com/ndownloader/files/13236644)

Fig. S3. Kaplan- Meier analysis of overall survival in the medically vs. surgically treated patients at seven years follow-up.


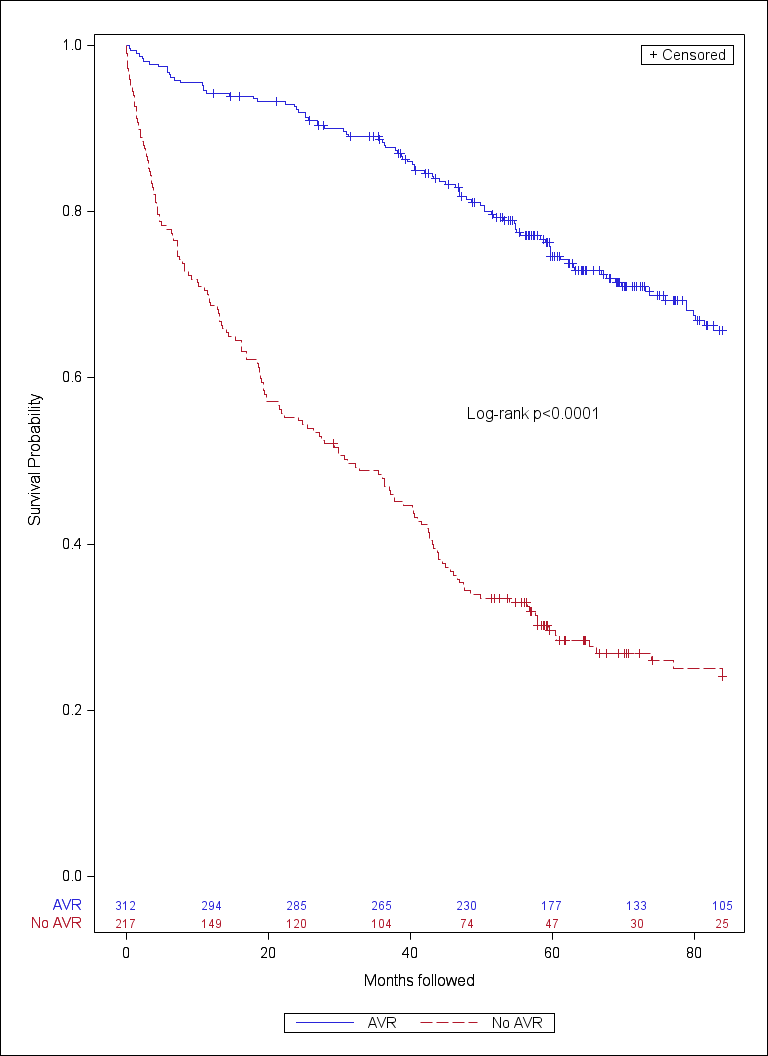

Supplement: Supplementary file 1 [file 13236644]
